# Supplementary material
Source: PubMed Central journal article supplement (PMC8051511)
Supplement: 3410_figures.pdf [file 3410_figures.pdf]

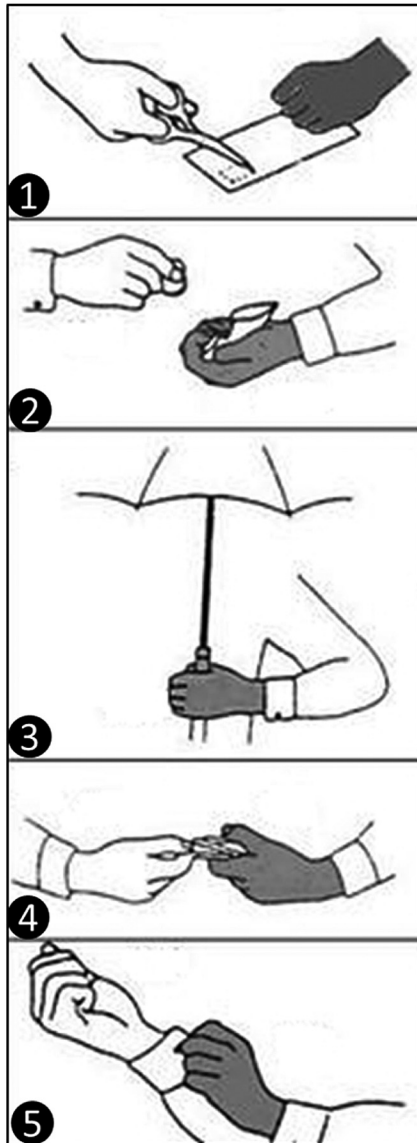

**ON-LINE FIG 1.** Illustration of Paralyzed Hand Function Assessment: The affected hand stabilizes a piece of paper on the table, with the unaffected hand controlling a shear to cut the paper. The affected hand holds a wallet, with the unaffected hand taking a coin from the wallet. The affected hand holds an unfolded umbrella in the air for at least 10 seconds. The affected hand controls a nail scissor to trim nails of the unaffected hand, and the affected hand buttons the cuff of the unaffected side. The hand in dark denotes the affected hand.

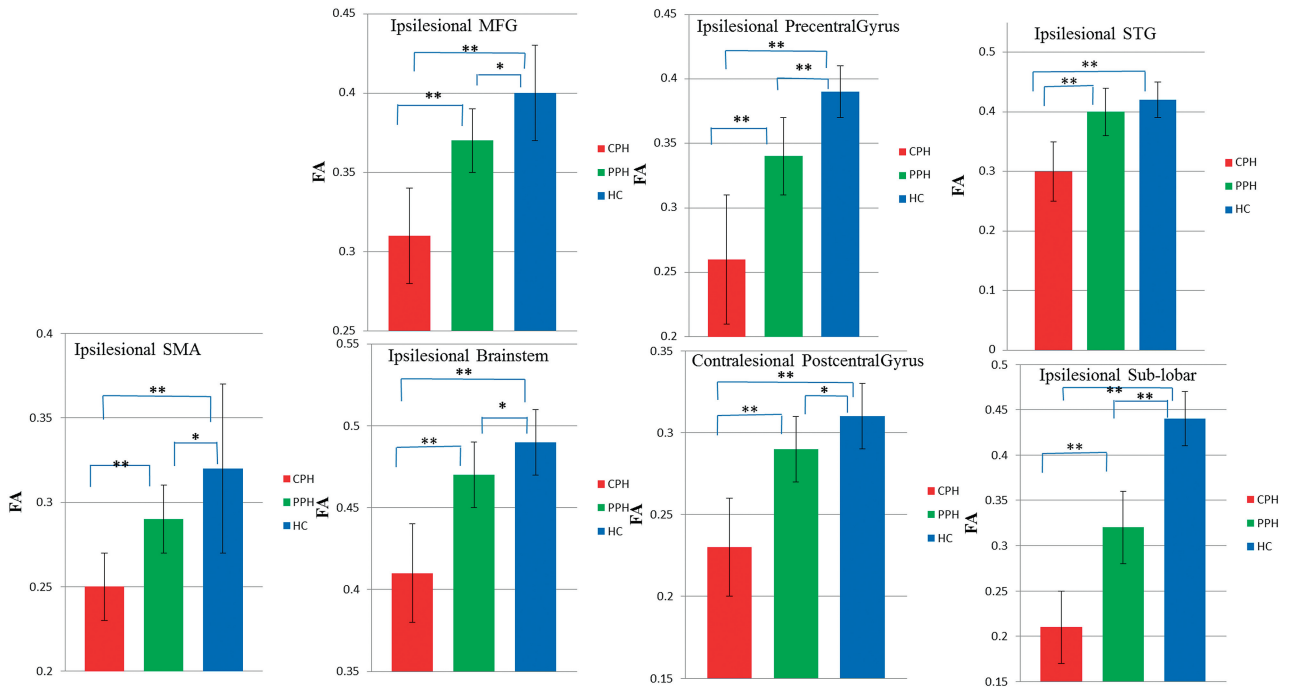

**ON-LINE FIG 2.** Quantitative ROI analysis of FA in the identified clusters detected by VBM analysis. MFG indicates medial frontal gyrus; STG: superior temporal gyrus; SMA: supplementary motor area; FMA: Fugl-Meyer Assessment. \* indicates  $P < .05$ ; \*\* indicates  $P < .01$ .

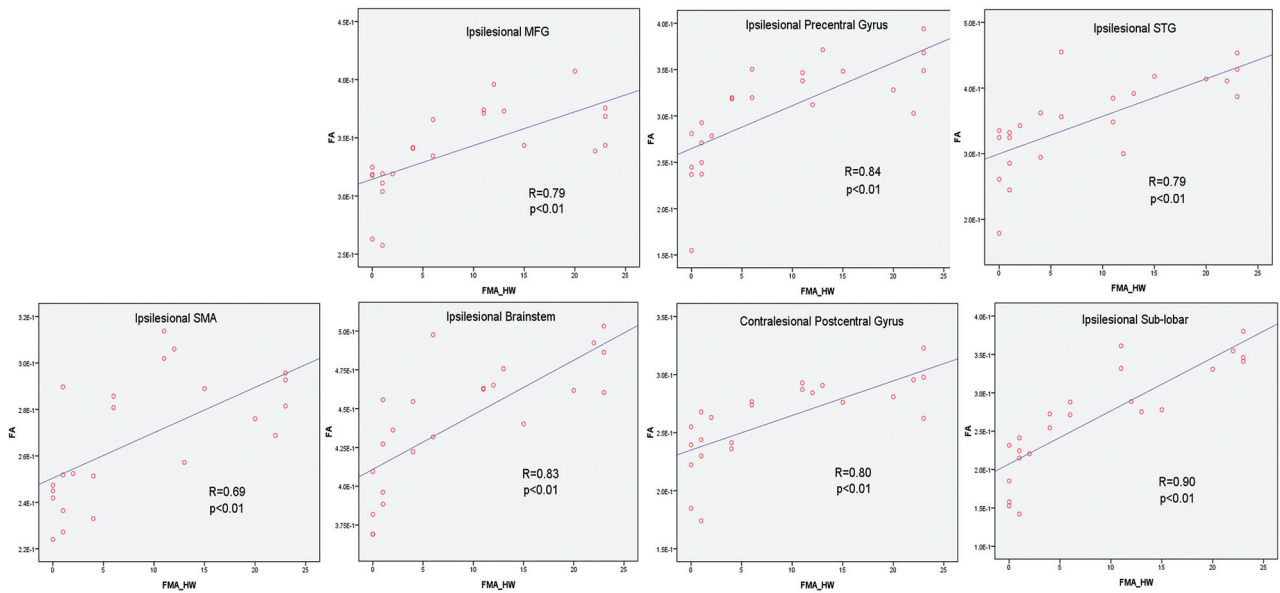

**ON-LINE FIG 3.** Significant correlation between Fugl-Meyer Assessment scores (hand + wrist) and FA value in the identified clusters detected by VBM analysis. MFG indicates medial frontal gyrus; SMA: supplementary motor area; STG: superior temporal gyrus; FMA: Fugl-Meyer Assessment; HW: hand + wrist.
